# Supplementary material for: Layered patterns in nature, medicine, and materials: quantifying anisotropic structures and cyclicity
Source: PeerJ. 2019 Oct 14;7:e7813. doi: 10.7717/peerj.7813 (PMC6797002; doi:10.7717/peerj.7813)
Supplement: Supplemental Information 1 [file peerj-07-7813-s001.xlsx]

## Sheet: Fig_05D
Transect #	DStr
0.019802	0.777778
0.029703	0.494709
0.039604	0.496032
0.049505	0.45
0.0594059	0.392857
0.0693069	0.323129
0.0792079	0.275794
0.0891089	0.256614
0.0990099	0.227778
0.108911	0.212121
0.118812	0.189815
0.128713	0.173382
0.138614	0.164966
0.148515	0.151852
0.158416	0.142361
0.168317	0.133987
0.178218	0.12522
0.188119	0.11863
0.19802	0.113889
0.207921	0.108466
0.217822	0.102453
0.227723	0.0979986
0.237624	0.0939153
0.247525	0.0911111
0.257426	0.0866911
0.267327	0.0834803
0.277228	0.0804989
0.287129	0.077723
0.29703	0.0759259
0.306931	0.0727087
0.316832	0.0704365
0.326733	0.0683021
0.336634	0.0662932
0.346535	0.0643991
0.356436	0.0626102
0.366337	0.0609181
0.376238	0.059315
0.386139	0.0577941
0.39604	0.0563492
0.405941	0.0549748
0.415842	0.0536659
0.425743	0.0524179
0.435644	0.0512266
0.445545	0.0500882
0.455446	0.0489993
0.465347	0.0479568
0.475248	0.0469577
0.485149	0.0459994
0.49505	0.0450794
0.50495	0.0441955
0.514851	0.0433455
0.524752	0.0425277
0.534653	0.0417402
0.544554	0.0409812
0.554455	0.0402494
0.564356	0.0395433
0.574257	0.0388615
0.584158	0.0382029
0.594059	0.0375661
0.60396	0.0369503
0.613861	0.0363543
0.623762	0.0357773
0.633663	0.0352183
0.643564	0.0346764
0.653465	0.034151
0.663366	0.0336413
0.673267	0.0331466
0.683168	0.0326662
0.693069	0.0321995
0.70297	0.031746
0.712871	0.0313051
0.722772	0.0308763
0.732673	0.030459
0.742574	0.0300529
0.752475	0.0296575
0.762376	0.0292723
0.772277	0.028897
0.782178	0.0285312
0.792079	0.0281746
0.80198	0.0278268
0.811881	0.0274874
0.821782	0.0271562
0.831683	0.026833
0.841584	0.0265173
0.851485	0.0262089
0.861386	0.0259077
0.871287	0.0256133
0.881188	0.0253255
0.891089	0.0250441
0.90099	0.0247689
0.910891	0.0244997
0.920792	0.0242362
0.930693	0.0239784
0.940594	0.023726
0.950495	0.0234788
0.960396	0.0232368
0.970297	0.0229997
0.980198	0.0227674
0.990099	0.0225397
1	0.0223165

## Sheet: Fig_06A
Transect #	DStr(a)	DStr(b)
0.027027	0.158358	0.616071
0.0675676	0.088011	0.44678
0.108108	0.0401793	0.3552
0.148649	0.0292011	0.295751
0.189189	0.0229437	0.27533
0.22973	0.0189079	0.238975
0.27027	0.0220432	0.215924
0.310811	0.0139754	0.207111
0.351351	0.0145979	0.189637
0.391892	0.011084	0.196714
0.432432	0.0100448	0.174766
0.472973	0.0125961	0.166811
0.513514	0.0131419	0.153524
0.554054	0.00783987	0.146986
0.594595	0.00730533	0.13122
0.635135	0.00683903	0.132054
0.675676	0.00881728	0.124496
0.716216	0.00945614	0.111314
0.756757	0.0068496	0.111211
0.797297	0.00544804	0.110375
0.837838	0.00518443	0.105256
0.878378	0.007766	0.0949709
0.918919	0.00737023	0.105974
0.959459	0.00452725	0.0912718
1	0.00434371	0.0949805

## Sheet: Fig_06B
Transect #	DStr(Orange)			Transect #	DStr(Red)	DStr(Blue)
0.0294118	0.86667			0.0454545	0.989189	0.684134
0.0470588	0.793376			0.0727273	0.923057	0.606492
0.0647059	0.700428			0.1	0.874693	0.45876
0.0823529	0.582715			0.127273	0.81987	0.430595
0.1	0.524964			0.154545	0.796241	0.371172
0.117647	0.479676			0.181818	0.750774	0.373438
0.135294	0.39857			0.209091	0.700464	0.337001
0.152941	0.383201			0.236364	0.681148	0.302343
0.170588	0.352991			0.263636	0.652907	0.268002
0.188235	0.339485			0.290909	0.62465	0.247298
0.205882	0.295161			0.318182	0.58991	0.227296
0.223529	0.285473			0.345455	0.571358	0.219234
0.241176	0.266933			0.372727	0.54932	0.205473
0.258824	0.258334			0.4	0.518215	0.197233
0.276471	0.232741			0.427273	0.495801	0.187729
0.294118	0.223292			0.454545	0.476605	0.178753
0.311765	0.211518			0.481818	0.465137	0.167339
0.329412	0.216336			0.509091	0.442329	0.162536
0.347059	0.196398			0.536364	0.438902	0.153379
0.364706	0.194679			0.563636	0.419676	0.146935
0.382353	0.18451			0.590909	0.40369	0.142005
0.4	0.175643			0.618182	0.399639	0.135809
0.417647	0.172639			0.645455	0.390722	0.132865
0.435294	0.16369			0.672727	0.378665	0.130943
0.452941	0.155307			0.7	0.360418	0.122717
0.470588	0.155862			0.727273	0.362677	0.126977
0.488235	0.149802			0.754545	0.348532	0.120096
0.505882	0.142089			0.781818	0.333443	0.114852
0.523529	0.137321			0.809091	0.334283	0.112833
0.541176	0.134839			0.836364	0.315043	0.110928
0.558824	0.132291			0.863636	0.317014	0.105742
0.576471	0.133285			0.890909	0.315152	0.104341
0.594118	0.121833			0.918182	0.300887	0.0987773
0.611765	0.125756			0.945455	0.294049	0.0990576
0.629412	0.121253			0.972727	0.294501	0.0975012
0.647059	0.117923			1	0.28484	0.0937272
0.664706	0.114207
0.682353	0.116546
0.7	0.10933
0.717647	0.1059
0.735294	0.106493
0.752941	0.104833
0.770588	0.100284
0.788235	0.103242
0.805882	0.0934614
0.823529	0.0964568
0.841176	0.0931967
0.858824	0.0927165
0.876471	0.0904486
0.894118	0.0889421
0.911765	0.0875588
0.929412	0.0845219
0.947059	0.083626
0.964706	0.081871
0.982353	0.0816282
1	0.0798577

## Sheet: Fig_07
Transect #	DStr(blue)	DStr(red)	DStr(green)
0.0204082	0.64	0.68894	0.942308
0.0510204	0.395206	0.358679	0.730233
0.0816327	0.223625	0.31528	0.641943
0.112245	0.247557	0.27555	0.573553
0.142857	0.257497	0.215857	0.462545
0.173469	0.24499	0.204532	0.466021
0.204082	0.192917	0.181661	0.402954
0.234694	0.169619	0.161327	0.377477
0.265306	0.174836	0.161877	0.34931
0.295918	0.128762	0.142043	0.328583
0.326531	0.132354	0.141424	0.285313
0.357143	0.131339	0.13795	0.277441
0.387755	0.123586	0.130935	0.269945
0.418367	0.126889	0.124726	0.252584
0.44898	0.117898	0.112174	0.246551
0.479592	0.104522	0.127935	0.232209
0.510204	0.103407	0.116831	0.221227
0.540816	0.0970927	0.111333	0.211722
0.571429	0.0919519	0.104503	0.213233
0.602041	0.0954004	0.106827	0.204913
0.632653	0.0881092	0.102782	0.197331
0.663265	0.0906527	0.0913267	0.179947
0.693878	0.0893618	0.10351	0.184509
0.72449	0.0837688	0.0932073	0.181967
0.755102	0.0776798	0.0892022	0.165948
0.785714	0.0811207	0.0903523	0.171902
0.816327	0.0674257	0.0819189	0.159871
0.846939	0.0718121	0.0821929	0.159401
0.877551	0.0701307	0.0820135	0.148738
0.908163	0.0680203	0.0795518	0.143865
0.938776	0.0681414	0.0734225	0.144059
0.969388	0.0646416	0.0712984	0.136163
1	0.0662012	0.0738881	0.135564

## Sheet: Fig_08
Transect #	DStr(Blue)	DStr(Orange)	DStr(Green)	DStr(Red)
0.0188679	0.92049	0.920874	0.925802	0.940074
0.0943396	0.691055	0.643663	0.566073	0.610902
0.169811	0.579453	0.516511	0.484163	0.491215
0.245283	0.475574	0.431191	0.410635	0.413004
0.320755	0.405866	0.38061	0.351446	0.35994
0.396226	0.353742	0.329438	0.304771	0.314748
0.471698	0.304313	0.296854	0.277696	0.263051
0.54717	0.27137	0.263692	0.239698	0.234488
0.622642	0.243432	0.231845	0.214814	0.211533
0.698113	0.214448	0.203415	0.191772	0.183437
0.773585	0.193114	0.186899	0.170624	0.170668
0.849057	0.173748	0.16741	0.15567	0.154901
0.924528	0.156276	0.148114	0.139785	0.14076
1	0.142413	0.135478	0.126574	0.123823

## Sheet: Fig_09-
Transect #	DStr(Owl)			Transect #	DStr(Pitta)			Transect #	DStr(Giant kingfisher)			Transect #	DStr(Harpactes 1)			Transect #	DStr(Harpactes 2)
0.0377358	0.953488			0.0487805	0.984127			0.0357143	1			0.0377358	1			0.0425532	0.702916
0.0943396	0.795685			0.121951	0.836967			0.0892857	1			0.0943396	0.768035			0.106383	0.378423
0.150943	0.656476			0.195122	0.698582			0.142857	1			0.150943	0.688483			0.170213	0.290797
0.207547	0.587616			0.268293	0.63404			0.196429	0.954545			0.207547	0.679479			0.234043	0.230101
0.264151	0.53528			0.341463	0.550435			0.25	0.95479			0.264151	0.579361			0.297872	0.198445
0.320755	0.492136			0.414634	0.51858			0.303571	0.920365			0.320755	0.548993			0.361702	0.160232
0.377358	0.438305			0.487805	0.478835			0.357143	0.914947			0.377358	0.476351			0.425532	0.134013
0.433962	0.379244			0.560976	0.449838			0.410714	0.886527			0.433962	0.449703			0.489362	0.123209
0.490566	0.389005			0.634146	0.416148			0.464286	0.854803			0.490566	0.409522			0.553191	0.113212
0.54717	0.377095			0.707317	0.407527			0.517857	0.834808			0.54717	0.380163			0.617021	0.102501
0.603774	0.323452			0.780488	0.375822			0.571429	0.828073			0.603774	0.351397			0.680851	0.101761
0.660377	0.333837			0.853659	0.35811			0.625	0.754889			0.660377	0.323397			0.744681	0.0968065
0.716981	0.31914			0.926829	0.338438			0.678571	0.748496			0.716981	0.31714			0.808511	0.0927138
0.773585	0.312787			1	0.305979			0.732143	0.705371			0.773585	0.317629			0.87234	0.089289
0.830189	0.292685							0.785714	0.693202			0.830189	0.295896			0.93617	0.0840571
0.886792	0.283129							0.839286	0.636497			0.886792	0.297047			1	0.0769714
0.943396	0.278348							0.892857	0.609192			0.943396	0.275026
1	0.267822							0.946429	0.606868			1	0.256174
								1	0.580014

## Sheet: Fig_10
Transect #	DStr(Low density)			Transect #	DStr(Medium density)			Transect #	DStr(High density)
0.0140845	0.921569			0.0142857	0.921569			0.0140845	0.921569
0.084507	0.389759			0.0571429	0.489499			0.028169	0.724048
0.15493	0.296104			0.1	0.373889			0.0422535	0.592481
0.225352	0.209501			0.142857	0.28048			0.056338	0.489499
0.295775	0.167489			0.185714	0.250901			0.0704225	0.449258
0.366197	0.14291			0.228571	0.209501			0.084507	0.389759
0.43662	0.122799			0.271429	0.186219			0.0985915	0.373889
0.507042	0.102713			0.314286	0.171416			0.112676	0.326996
0.577465	0.090055			0.357143	0.15795			0.126761	0.313627
0.647887	0.0847549			0.4	0.132137			0.140845	0.28048
0.71831	0.0691798			0.442857	0.122799			0.15493	0.296104
0.788732	0.0649018			0.485714	0.11594			0.169014	0.252488
0.859155	0.0598584			0.528571	0.0977624			0.183099	0.250901
0.929577	0.0577164			0.571429	0.0984525			0.197183	0.241169
1	0.0530115			0.614286	0.0887346			0.211268	0.234489
				0.657143	0.0847549			0.225352	0.209501
				0.7	0.0761081			0.239437	0.210046
				0.742857	0.07089			0.253521	0.190207
				0.785714	0.0720593			0.267606	0.186219
				0.828571	0.0638416			0.28169	0.179622
				0.871429	0.0598584			0.295775	0.167489
				0.914286	0.0552338			0.309859	0.171416
				0.957143	0.052019			0.323944	0.162397
				1	0.0506675			0.338028	0.153259
								0.352113	0.15795
								0.366197	0.14291
								0.380282	0.142863
								0.394366	0.132137
								0.408451	0.130799
								0.422535	0.127377
								0.43662	0.122799
								0.450704	0.114929
								0.464789	0.120086
								0.478873	0.11594
								0.492958	0.110847
								0.507042	0.102713
								0.521127	0.0977624
								0.535211	0.100836
								0.549296	0.0971758
								0.56338	0.0984525
								0.577465	0.090055
								0.591549	0.0890307
								0.605634	0.0887346
								0.619718	0.08601
								0.633803	0.0918093
								0.647887	0.0847549
								0.661972	0.0802737
								0.676056	0.0754846
								0.690141	0.0761081
								0.704225	0.0775357
								0.71831	0.0691798
								0.732394	0.07089
								0.746479	0.067469
								0.760563	0.0674718
								0.774648	0.0720593
								0.788732	0.0649018
								0.802817	0.065694
								0.816901	0.0638416
								0.830986	0.0581622
								0.84507	0.0607485
								0.859155	0.0598584
								0.873239	0.0621854
								0.887324	0.0583702
								0.901408	0.0552338
								0.915493	0.053363
								0.929577	0.0577164
								0.943662	0.052019
								0.957746	0.0558091
								0.971831	0.0500139
								0.985915	0.0506675
								1	0.0530115

## Sheet: Fig_11
Transect #	DStr(Plain arch)	DStr(Tented arch)	DStr(Whorl)	DStr(Centralpocket loop)
15	0.243359	0.303088	0.322113	0.434778
21	0.186159	0.219518	0.253224	0.336216
27	0.146144	0.179417	0.206271	0.287735
33	0.115314	0.147532	0.177364	0.243194
39	0.108488	0.12697	0.154494	0.22221
45	0.0942437	0.112863	0.130542	0.191104
51	0.0852017	0.0963665	0.121653	0.188823
57	0.0746167	0.0875344	0.108174	0.16404
63	0.0673021	0.0795416	0.100006	0.158736
69	0.0630542	0.0723773	0.0897917	0.141283
75	0.055694	0.068125	0.0905187	0.141682
81	0.0523085	0.0640085	0.0829353	0.129923
87	0.0491818	0.0606495	0.0781278	0.116779
93	0.0472586	0.0549908	0.0699747	0.118813
99	0.0459233	0.0525613	0.0666451	0.107466
105	0.0416775	0.0492717	0.0642739	0.10857
111	0.04046	0.0469068	0.0608329	0.102617
117	0.0380215	0.0442288	0.0594653	0.0963272
123	0.0367345	0.0418804	0.0566114	0.0915691
129	0.0341802	0.0399407	0.0550925	0.0933028
135	0.032093	0.0407523	0.0536089	0.0924576
141	0.0309016	0.0378521	0.051127	0.0888015
147	0.0303969	0.0371941	0.0477434	0.0905208

## Sheet: Fig_17
Transects #	DStr(eye angiogram after changes)	DStr(eye angiogram before changes)				Transects #	DStr(fingerprint after changes)	DStr(fingerprint before changes)				Transects #	DStr(fish scale after changes)	DStr(fish scale before changes)						DStr
0.0210526	1	1				0.027027	0.972973	0.972973				0.0217391	0.786626	0.843465				Eye angiogram	Before changes	0.438757
0.0526316	0.931636	0.931636				0.0675676	0.677794	0.683947				0.0543478	0.474687	0.530569				Eye angiogram	After changes	0.436217
0.0842105	0.895337	0.895337				0.108108	0.495464	0.503638				0.0869565	0.393779	0.425922				Fingerprint	Before changes	0.20742
0.115789	0.835248	0.835248				0.148649	0.387739	0.393186				0.119565	0.287501	0.315702				Fingerprint	After changes	0.20533
0.147368	0.797598	0.797598				0.189189	0.31598	0.31732				0.152174	0.25744	0.287594				Fish scale	Before changes	0.199074
0.178947	0.711012	0.718602				0.22973	0.288283	0.286229				0.184783	0.248962	0.271693				Fish scale	After changes	0.184142
0.210526	0.641484	0.647936				0.27027	0.24309	0.248186				0.217391	0.183834	0.202269
0.242105	0.6147	0.619065				0.310811	0.209146	0.211718				0.25	0.187358	0.20845
0.273684	0.554732	0.560563				0.351351	0.19384	0.195819				0.282609	0.165884	0.178988
0.305263	0.520971	0.526046				0.391892	0.177803	0.181315				0.315217	0.19158	0.207141
0.336842	0.477286	0.481759				0.432432	0.163227	0.167166				0.347826	0.179716	0.193661
0.368421	0.471751	0.475841				0.472973	0.145628	0.147661				0.380435	0.154096	0.170251
0.4	0.423751	0.427599				0.513514	0.142252	0.144534				0.413043	0.161443	0.174151
0.431579	0.398855	0.402422				0.554054	0.122404	0.125528				0.445652	0.187023	0.198686
0.463158	0.389223	0.392547				0.594595	0.113738	0.115624				0.478261	0.158677	0.170847
0.494737	0.364992	0.368117				0.635135	0.116404	0.116201				0.51087	0.162499	0.173423
0.526316	0.369011	0.371949				0.675676	0.111628	0.113617				0.543478	0.156266	0.167949
0.557895	0.351274	0.354045				0.716216	0.107593	0.109426				0.576087	0.135728	0.146581
0.589474	0.315841	0.318618				0.756757	0.0914979	0.0917115				0.608696	0.152718	0.163145
0.621053	0.320663	0.323219				0.797297	0.0929538	0.0928264				0.641304	0.133477	0.143131
0.652632	0.299544	0.301977				0.837838	0.0878274	0.0891614				0.673913	0.134314	0.143148
0.684211	0.298223	0.300572				0.878378	0.082638	0.0834763				0.706522	0.111162	0.117646
0.715789	0.287236	0.289482				0.918919	0.0893769	0.0883964				0.73913	0.137172	0.144428
0.747368	0.268423	0.270574				0.959459	0.0824503	0.083102				0.771739	0.122441	0.129216
0.778947	0.258571	0.260635				1	0.079147	0.0801604				0.804348	0.112135	0.119879
0.810526	0.244711	0.246694										0.836957	0.114295	0.121346
0.842105	0.241127	0.243036										0.869565	0.126457	0.133913
0.873684	0.236338	0.236893										0.902174	0.110251	0.115138
0.905263	0.245037	0.245573										0.934783	0.131835	0.139743
0.936842	0.223303	0.223821										0.967391	0.121371	0.126409
0.968421	0.22146	0.221961										1	0.119249	0.124369
1	0.208369	0.209238
