# Supplementary material for: Layered patterns in nature, medicine, and materials: quantifying anisotropic structures and cyclicity
Source: PeerJ. 2019 Oct 14;7:e7813. doi: 10.7717/peerj.7813 (PMC6797002; doi:10.7717/peerj.7813)
Supplement: Supplemental Information 5 [file peerj-07-7813-s005.xlsm]

## Sheet: AORTA_Cont-vs-Line
File Name	DStr(contour)		File Name	DStr(line)
A-04.bmp	0.20931		A-04-1.bmp	0.2268
A-05.bmp	0.240445		A-05-1.bmp	0.228031
A-06.bmp	0.236014		A-06-1.bmp	0.233692
A-07.bmp	0.291593		A-07-1.bmp	0.254154
A-08.bmp	0.248722		A-08-1.bmp	0.243464
A-09.bmp	0.23326		A-09-1.bmp	0.223372
B-03.bmp	0.212463		B-03-1.bmp	0.217757
B-04.bmp	0.261785		B-04-1.bmp	0.244001
B-05.bmp	0.238906		B-05-1.bmp	0.23826
B-06.bmp	0.195172		B-06-1.bmp	0.192725
B-07.bmp	0.181634		B-07-1.bmp	0.188851
B-08.bmp	0.221418		B-08-1.bmp	0.213378
B-09.bmp	0.261927		B-09-1.bmp	0.238248
B-10.bmp	0.219241		B-10-1.bmp	0.212122
C-02.bmp	0.269081		C-02-1.bmp	0.242767
C-03.bmp	0.30269		C-03-1.bmp	0.284947
C-04.bmp	0.247716		C-04-1.bmp	0.241733
C-05.bmp	0.263071		C-05-1.bmp	0.234603
C-06.bmp	0.258606		C-06-1.bmp	0.243843
C-07.bmp	0.231229		C-07-1.bmp	0.216964
C-08.bmp	0.231986		C-08-1.bmp	0.248206
C-09.bmp	0.163033		C-09-1.bmp	0.177929
C-10.bmp	0.132562		C-10-1.bmp	0.138929
C-11.bmp	0.138642		C-11-1.bmp	0.156082
C-12.bmp	0.129363		C-12-1.bmp	0.13851
D-01.bmp	0.247994		D-01-1.bmp	0.223375
D-02.bmp	0.242273		D-02-1.bmp	0.238592
D-03.bmp	0.230534		D-03-1.bmp	0.210385
D-04.bmp	0.265173		D-04-1.bmp	0.254949
D-05.bmp	0.258612		D-05-1.bmp	0.23085
D-06.bmp	0.216281		D-06-1.bmp	0.189566
D-07.bmp	0.182434		D-07-1.bmp	0.186362
D-08.bmp	0.232312		D-08-1.bmp	0.222796
D-09.bmp	0.218972		D-09-1.bmp	0.206524
D-10.bmp	0.21505		D-10-1.bmp	0.228017
D-11.bmp	0.22414		D-11-1.bmp	0.225207
D-12.bmp	0.214978		D-12-1.bmp	0.194928
D-13.bmp	0.199729		D-13-1.bmp	0.199001
E-02.bmp	0.260632		E-02-1.bmp	0.23899
E-03.bmp	0.24119		E-03-1.bmp	0.241051
E-04.bmp	0.270233		E-04-1.bmp	0.245755
E-05.bmp	0.23907		E-05-1.bmp	0.226764
E-06.bmp	0.228377		E-06-1.bmp	0.202281
E-07.bmp	0.209483		E-07-1.bmp	0.201677
E-08.bmp	0.225391		E-08-1.bmp	0.209167
E-09.bmp	0.236781		E-09-1.bmp	0.23616
E-10.bmp	0.214663		E-10-1.bmp	0.216546
E-11.bmp	0.207213		E-11-1.bmp	0.186383
E-12.bmp	0.167356		E-12-1.bmp	0.177161
E-13.bmp	0.226177		E-13-1.bmp	0.20569
E-14.bmp	0.256801		E-14-1.bmp	0.232214
F-03.bmp	0.2531		F-03-1.bmp	0.230906
F-04.bmp	0.245404		F-04-1.bmp	0.238094
F-05.bmp	0.251924		F-05-1.bmp	0.23446
F-06.bmp	0.225861		F-06-1.bmp	0.221419
F-07.bmp	0.262527		F-07-1.bmp	0.248821
F-08.bmp	0.213655		F-08-1.bmp	0.220536
F-09.bmp	0.219929		F-09-1.bmp	0.222941
F-10.bmp	0.182064		F-10-1.bmp	0.193626
F-11.bmp	0.208017		F-11-1.bmp	0.207021
F-12.bmp	0.221003		F-12-1.bmp	0.211335
F-13.bmp	0.205488		F-13-1.bmp	0.200094

## Sheet: MARS_Cont-vs-Line
File Name	DStr(contour)		File Name	DStr(line)
A-07	0.232381		A-07-1	0.257384
B-07	0.206134		B-07-1	0.222779
B-08	0.265676		B-08-1	0.289598
C-06	0.213329		C-06-1	0.231649
C-07	0.234306		C-07-1	0.249183
C-08	0.329416		C-08-1	0.335708
C-09	0.222085		C-09-1	0.238661
C-10	0.197653		C-10-1	0.21637
D-05	0.241407		D-05-1	0.246681
D-06	0.198403		D-06-1	0.205276
D-07	0.229446		D-07-1	0.244945
D-08	0.444963		D-08-1	0.441371
D-09	0.252906		D-09-1	0.268058
D-10	0.20181		D-10-1	0.215452
D-11	0.215106		D-11-1	0.234629
E-05	0.214995		E-05-1	0.230101
E-06	0.213371		E-06-1	0.224804
E-07	0.256879		E-07-1	0.272461
E-08	0.272487		E-08-1	0.280147
E-09	0.206959		E-09-1	0.224643
E-10	0.187822		E-10-1	0.208458
E-11	0.259661		E-11-1	0.276197
E-12	0.252053		E-12-1	0.253685
E-13	0.283992		E-13-1	0.283038
F-04	0.244576		F-04-1	0.252904
F-05	0.220554		F-05-1	0.227575
F-06	0.268479		F-06-1	0.276776
F-07	0.244876		F-07-1	0.255929
F-08	0.250776		F-08-1	0.266483
F-09	0.192963		F-09-1	0.203723
F-10	0.205501		F-10-1	0.216117
F-11	0.247404		F-11-1	0.241118
F-12	0.229427		F-12-1	0.237824
F-13	0.208983		F-13-1	0.219465
F-14	0.230775		F-14-1	0.247453
F-15	0.269125		F-15-1	0.248441
G-03	0.283849		G-03-1	0.28573
G-04	0.244842		G-04-1	0.257586
G-05	0.24222		G-05-1	0.237791
G-06	0.21114		G-06-1	0.232995
G-07	0.186897		G-07-1	0.206221
G-08	0.176744		G-08-1	0.204895
G-09	0.182798		G-09-1	0.206745
G-10	0.206166		G-10-1	0.213618
G-11	0.211126		G-11-1	0.225545
G-12	0.239577		G-12-1	0.251491
G-13	0.26174		G-13-1	0.26401
G-14	0.20336		G-14-1	0.221149
G-15	0.215526		G-15-1	0.222833
G-16	0.240329		G-16-1	0.232649
H-03	0.240515		H-03-1	0.252635
H-04	0.243889		H-04-1	0.248391
H-05	0.244279		H-05-1	0.242004
H-06	0.206456		H-06-1	0.232576
H-07	0.198881		H-07-1	0.21037
H-08	0.188367		H-08-1	0.206814
H-09	0.186714		H-09-1	0.213266
H-10	0.17246		H-10-1	0.193688
H-11	0.218367		H-11-1	0.224378
H-12	0.196142		H-12-1	0.2003
H-13	0.222394		H-13-1	0.243644
H-14	0.21518		H-14-1	0.232137
H-15	0.210827		H-15-1	0.233208
H-16	0.173606		H-16-1	0.193421
H-17	0.178021		H-17-1	0.194819
H-18	0.259009		H-18-1	0.250992
I-02	0.2399		I-02-1	0.240123
I-03	0.22936		I-03-1	0.240451
I-04	0.220947		I-04-1	0.23616
I-05	0.190256		I-05-1	0.20934
I-06	0.188897		I-06-1	0.218404
I-07	0.19369		I-07-1	0.208507
I-08	0.183972		I-08-1	0.212105
I-09	0.20012		I-09-1	0.226398
I-10	0.169997		I-10-1	0.194513
I-11	0.227844		I-11-1	0.224968
I-12	0.23308		I-12-1	0.247383
I-13	0.266389		I-13-1	0.275129
I-14	0.243531		I-14-1	0.253564
I-15	0.234391		I-15-1	0.239163
I-16	0.210207		I-16-1	0.222424
I-17	0.242044		I-17-1	0.24994
I-18	0.211939		I-18-1	0.201965
I-19	0.237848		I-19-1	0.247676
J-04	0.195342		J-04-1	0.21398
J-05	0.205991		J-05-1	0.23071
J-06	0.180512		J-06-1	0.208352
J-07	0.177216		J-07-1	0.20081
J-08	0.182672		J-08-1	0.208063
J-09	0.1902		J-09-1	0.206183
J-10	0.209403		J-10-1	0.234588
J-11	0.215213		J-11-1	0.231921
J-12	0.203955		J-12-1	0.215681
J-13	0.268739		J-13-1	0.27668
J-14	0.259133		J-14-1	0.27871
J-15	0.232223		J-15-1	0.227984
J-16	0.183899		J-16-1	0.208573
J-17	0.177988		J-17-1	0.190292
J-18	0.210312		J-18-1	0.227541
J-19	0.277199		J-19-1	0.282675
J-20	0.309237		J-20-1	0.316937
J-21	0.308556		J-21-1	0.313089
K-06	0.198034		K-06-1	0.219809
K-07	0.216322		K-07-1	0.225243
K-08	0.204208		K-08-1	0.22474
K-09	0.219314		K-09-1	0.231816
K-10	0.221408		K-10-1	0.219579
K-11	0.235054		K-11-1	0.245204
K-12	0.222811		K-12-1	0.230902
K-13	0.215729		K-13-1	0.222587
K-14	0.256766		K-14-1	0.270048
K-15	0.24748		K-15-1	0.263546
K-16	0.198688		K-16-1	0.206929
K-17	0.154752		K-17-1	0.178329
K-18	0.18821		K-18-1	0.198978
K-19	0.28421		K-19-1	0.269148
K-20	0.266673		K-20-1	0.263578
K-21	0.221235		K-21-1	0.235266
K-22	0.322665		K-22-1	0.313614
L-07	0.228867		L-07-1	0.241782
L-08	0.215375		L-08-1	0.236331
L-09	0.238435		L-09-1	0.255728
L-10	0.187811		L-10-1	0.208649
L-11	0.190615		L-11-1	0.192335
L-12	0.275171		L-12-1	0.267349
L-13	0.235648		L-13-1	0.239001
L-14	0.212542		L-14-1	0.22803
L-15	0.319367		L-15-1	0.318122
L-16	0.246276		L-16-1	0.251767
L-17	0.174773		L-17-1	0.194647
L-18	0.228807		L-18-1	0.239281
L-19	0.152683		L-19-1	0.174442
L-20	0.202064		L-20-1	0.215508
L-21	0.274085		L-21-1	0.275925
L-22	0.22952		L-22-1	0.231262
L-23	0.378073		L-23-1	0.362135
M-09	0.161037		M-09-1	0.177808
M-10	0.170469		M-10-1	0.198577
M-11	0.191735		M-11-1	0.213106
M-12	0.186062		M-12-1	0.194015
M-13	0.187747		M-13-1	0.205685
M-14	0.195567		M-14-1	0.218599
M-15	0.386241		M-15-1	0.383697
M-16	0.25307		M-16-1	0.262871
M-17	0.173103		M-17-1	0.18311
M-18	0.130796		M-18-1	0.165224
M-19	0.227893		M-19-1	0.236674
M-20	0.258304		M-20-1	0.244924
M-21	0.252071		M-21-1	0.264491
M-22	0.360435		M-22-1	0.340888
N-10	0.154839		N-10-1	0.169386
N-11	0.175		N-11-1	0.194575
N-12	0.15865		N-12-1	0.182136
N-13	0.1553		N-13-1	0.175341
N-14	0.253459		N-14-1	0.270458
N-15	0.439008		N-15-1	0.43391
N-16	0.324272		N-16-1	0.319235
N-17	0.184008		N-17-1	0.207346
N-18	0.252334		N-18-1	0.226893
N-19	0.2717		N-19-1	0.27613
N-20	0.280592		N-20-1	0.273083
N-21	0.245474		N-21-1	0.243244
N-22	0.371255		N-22-1	0.33989
O-12	0.14888		O-12-1	0.177223
O-13	0.158868		O-13-1	0.185998
O-14	0.445885		O-14-1	0.439147
O-15	0.304695		O-15-1	0.305218
O-16	0.26911		O-16-1	0.278857
O-17	0.185703		O-17-1	0.20525
O-18	0.270242		O-18-1	0.268689
O-19	0.239786		O-19-1	0.235671
O-20	0.259233		O-20-1	0.273143
O-21	0.341649		O-21-1	0.342363
P-13	0.224055		P-13-1	0.228756
P-14	0.427538		P-14-1	0.42099
P-15	0.263183		P-15-1	0.254672
P-16	0.211716		P-16-1	0.232696
P-17	0.232903		P-17-1	0.228441
P-18	0.270032		P-18-1	0.253549
P-19	0.321863		P-19-1	0.298284
P-20	0.205314		P-20-1	0.207133
Q-15	0.206818		Q-15-1	0.224409
Q-16	0.187457		Q-16-1	0.191104
Q-17	0.222259		Q-17-1	0.22754
Q-18	0.290793		Q-18-1	0.284508
Q-19	0.276706		Q-19-1	0.278767
Q-20	0.208157		Q-20-1	0.217048
R-16	0.269394		R-16-1	0.268597
R-17	0.235084		R-17-1	0.229218
R-18	0.181202		R-18-1	0.20038
R-19	0.141767		R-19-1	0.157383
S-18	0.13768		S-18-1	0.159285
